# Supplementary material for: Phylogenomics and biogeography of Cunoniaceae (Oxalidales) with complete generic sampling and taxonomic realignments
Source: PubMed Central journal article supplement — Am J Bot. 2021 Jul 18;108(7):1181–200. doi: 10.1002/ajb2.1688 (PMC8361763; doi:10.1002/ajb2.1688), 2021-07-18
Supplement: AJB2-108-1181-s003.pdf [file AJB2-108-1181-s003.pdf]

**Appendix S3.** Geographical area assignments for each terminal included in the biogeographical analysis.

| 53                                      | 9 | (A B C D E F G H I) |           |
|-----------------------------------------|---|---------------------|-----------|
| Brunelliaceae_Brunellia_mexicana        |   |                     | 000001000 |
| Cephalotaceae_Cephalotus_follicularis   |   |                     | 001000000 |
| Cunoniaceae_Ackama_australiensis        |   |                     | 001000000 |
| Cunoniaceae_Ackama_paniculosa           |   |                     | 001000000 |
| Cunoniaceae_Ackama_rosifolia            |   |                     | 000010000 |
| Cunoniaceae_Acrophyllum_australe        |   |                     | 001000000 |
| Cunoniaceae_Aistopetalum_viticoides     |   |                     | 001000000 |
| Cunoniaceae_Anodopetalum_biglandulosum  |   |                     | 001000000 |
| Cunoniaceae_Bauera_rubioides            |   |                     | 001000000 |
| Cunoniaceae_Caldcluvia_paniculata       |   |                     | 000001000 |
| Cunoniaceae_Callicoma_serratifolia      |   |                     | 001000000 |
| Cunoniaceae_Ceratopetalum_apetalum      |   |                     | 001000000 |
| Cunoniaceae_Codia_montana               |   |                     | 000100000 |
| Cunoniaceae_Cunonia_capensis            |   |                     | 100000000 |
| Cunoniaceae_Cunonia_cerifera            |   |                     | 000100000 |
| Cunoniaceae_Davidsonia_jerseyana        |   |                     | 001000000 |
| Cunoniaceae_Eucryphia_glutinosa         |   |                     | 000001000 |
| Cunoniaceae_Eucryphia_milliganii        |   |                     | 001000000 |
| Cunoniaceae_Geissois_racemosa           |   |                     | 000100010 |
| Cunoniaceae_Gillbeea_adenopetala        |   |                     | 001000000 |
| Cunoniaceae_Hooglandia_ignambiensis     |   |                     | 000100000 |
| Cunoniaceae_Karrabina_benthamiana       |   |                     | 001000000 |
| Cunoniaceae_Lamanonia_ternata           |   |                     | 000001000 |
| Cunoniaceae_Opocunonia_nymanii          |   |                     | 001000000 |
| Cunoniaceae_Pancheria_elegans           |   |                     | 000100000 |
| Cunoniaceae_Platylophus_trifoliatus     |   |                     | 100000000 |
| Cunoniaceae_Pseudoweinmannia_apetala    |   |                     | 001000000 |
| Cunoniaceae_Pullea_glabra               |   |                     | 001000010 |
| Cunoniaceae_Schizomeria_serrata         |   |                     | 001000010 |
| Cunoniaceae_Spiraeanthemum_meridionale  |   |                     | 001100010 |
| Cunoniaceae_Spiraeopsis_fulva           |   |                     | 001000000 |
| Cunoniaceae_Spiraeopsis_rufa            |   |                     | 001000110 |
| Cunoniaceae_Vesselowskya_rubifolia      |   |                     | 001000000 |
| Cunoniaceae>Weinmannia_bojeriana        |   |                     | 010000000 |
| Cunoniaceae>Weinmannia_dichotoma        |   |                     | 000110010 |
| Cunoniaceae>Weinmannia_fraxinea         |   |                     | 001000110 |
| Cunoniaceae>Weinmannia_madagascariensis |   |                     | 010000000 |
| Cunoniaceae>Weinmannia_pinnata          |   |                     | 000001000 |
| Cunoniaceae>Weinmannia_tinctoria        |   |                     | 010000000 |
| Elaeocarpaceae_Aceratium_doggrellii     |   |                     | 001000010 |
| Elaeocarpaceae_Aristotelia_chilensis    |   |                     | 000001000 |
| Elaeocarpaceae_Aristotelia_fruticosa    |   |                     | 000010000 |
| Elaeocarpaceae_Aristotelia_peduncularis |   |                     | 001000000 |
| Elaeocarpaceae_Crinodendron_patagua     |   |                     | 000001000 |
| Elaeocarpaceae_Dubouzetia_              |   |                     | 001100000 |
| Elaeocarpaceae_Elaeocarpus_donghaiensis |   |                     | 011110110 |
| Elaeocarpaceae_Peripentadenia_phelpsii  |   |                     | 001000000 |

Pillon et al. – American Journal of Botany 2021 – Appendix S3

|                                       |           |
|---------------------------------------|-----------|
| Elaeocarpaceae_Platythea_verticillata | 001000000 |
| Elaeocarpaceae_Sericolea_calophylla   | 001000000 |
| Elaeocarpaceae_Tetratheca_glandulosa  | 001000000 |
| Elaeocarpaceae_Tremandra_stelligera   | 001000000 |
| Elaeocarpaceae_Vallea_stipularis5452  | 000001000 |
| Elaeocarpaceae_Vallea_stipularis5453  | 000001000 |
