# Supplementary figures and images for: Phylogenomics and biogeography of Cunoniaceae (Oxalidales) with complete generic sampling and taxonomic realignments
Source: PubMed Central journal article supplement — Am J Bot. 2021 Jul 18;108(7):1181–200. doi: 10.1002/ajb2.1688 (PMC8361763; doi:10.1002/ajb2.1688), 2021-07-18

**Appendix S4.** Dated tree of crown Oxalidales.

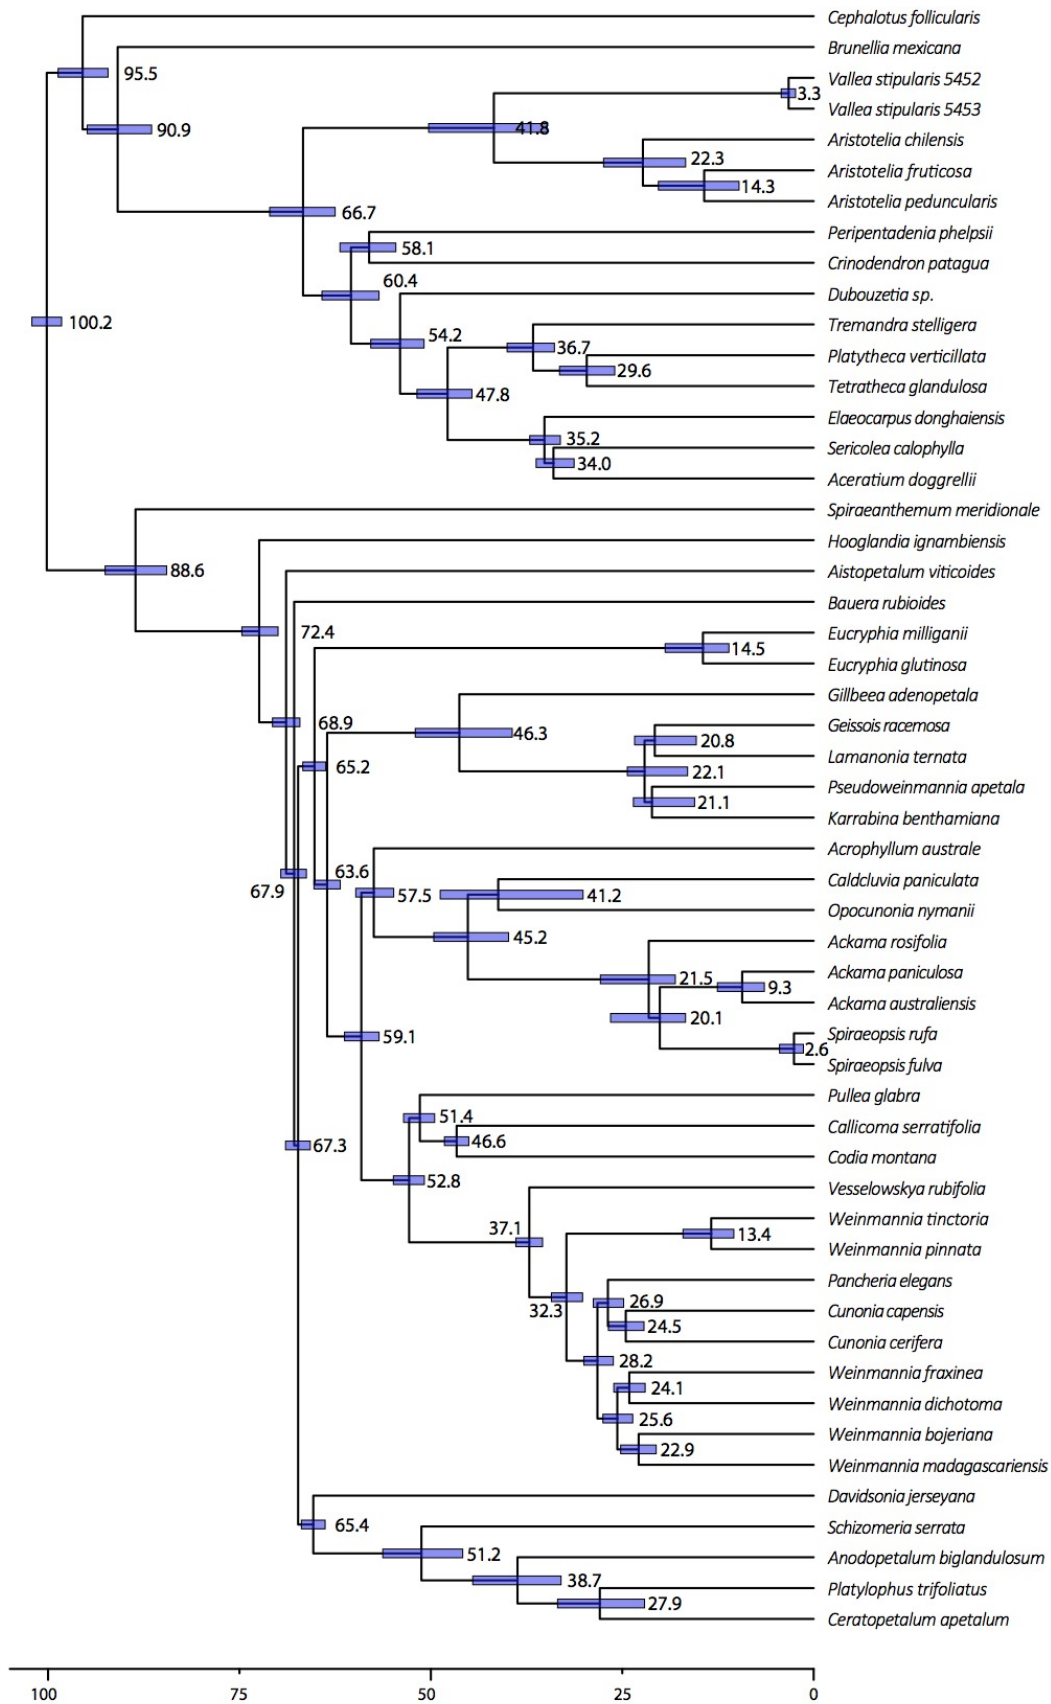

Supplement: AJB2-108-1181-s002.pdf [file AJB2-108-1181-s002.pdf]
